# Supplementary material for: α-Fe2O3 quantum dots: low-cost synthesis and photocatalytic oxygen evolution capabilities
Source: Royal Society of Chemistry journal article supplement (doi:10.1039/c6ra04464f), 2016-01-01
Supplement: c6ra04464f1.pdf [file c6ra04464f1.pdf]

## Electronic Supplementary Information (ESI)

### **$\alpha$ -Fe<sub>2</sub>O<sub>3</sub> quantum dots: Low-cost synthesis and photocatalytic oxygen evolution capabilities**

Jian Wang, Ning Zhang, Jinzhan Su\*, Liejin Guo

*International Research Center for Renewable Energy (IRCRE), State Key Laboratory of Multiphase Flow in Power Engineering (MFPE), Xi'an Jiaotong University (XJTU), Xi'an, Shaanxi 710049, China.*

\*Corresponding author.

Dr. Jinzhan Su

Tel.: +86-29-82668296; Fax: +86-29-82669033.

Email: j.su@mail.xjtu.edu.cn

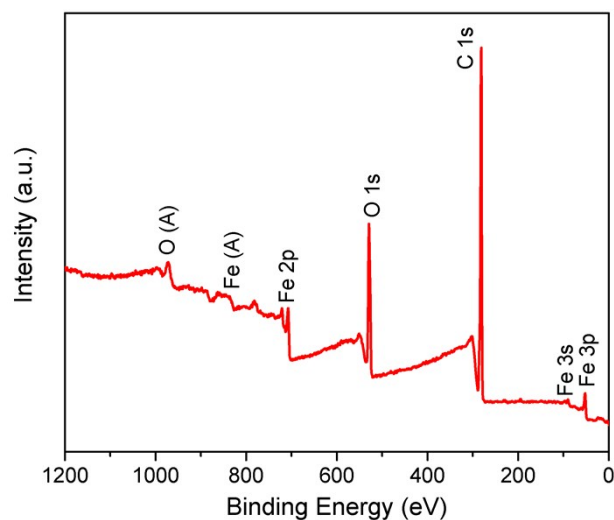

**Fig. S1** Survey XPS spectra collected for  $\alpha$ -Fe<sub>2</sub>O<sub>3</sub> QDs.

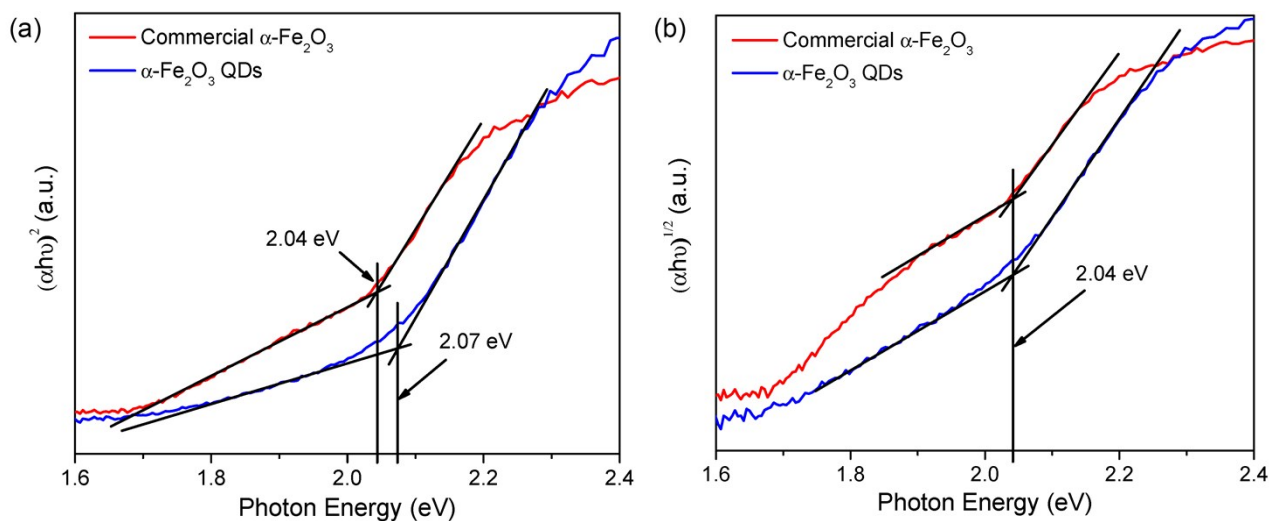

**Fig. S2** (a) Direct transition and (b) indirect band gaps for  $\alpha$ -Fe<sub>2</sub>O<sub>3</sub> QDs and commercial  $\alpha$ -Fe<sub>2</sub>O<sub>3</sub>.

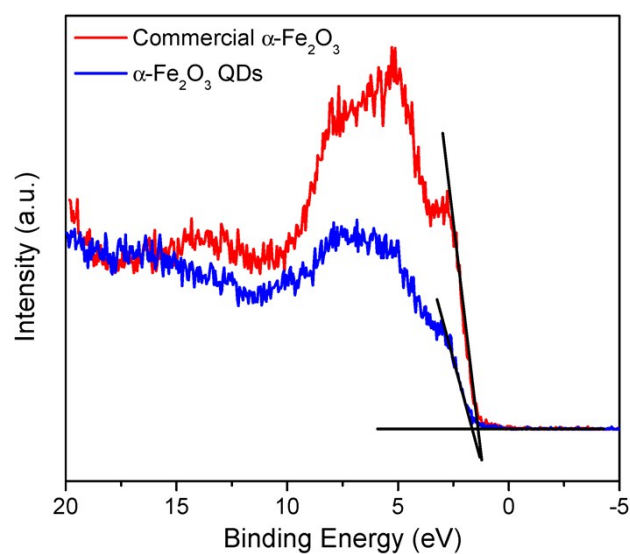

**Fig. S3** Valence-band XPS spectra of  $\alpha$ -Fe<sub>2</sub>O<sub>3</sub> QDs and commercial  $\alpha$ -Fe<sub>2</sub>O<sub>3</sub>

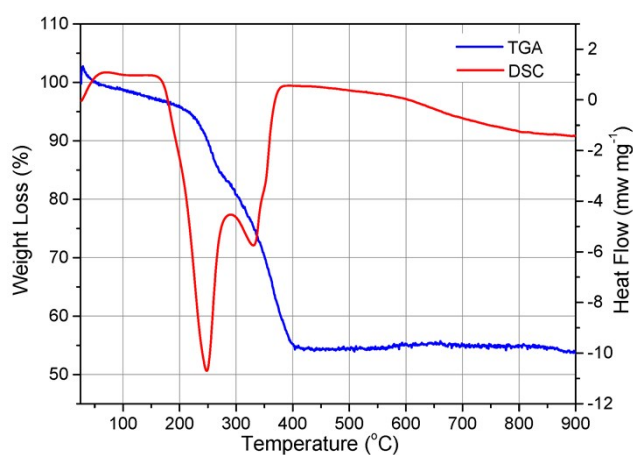

**Fig. S4** Thermogravimetric analysis (TGA) and differential scanning calorimetry (DSC) data of  $\alpha$ -Fe<sub>2</sub>O<sub>3</sub> QDs.

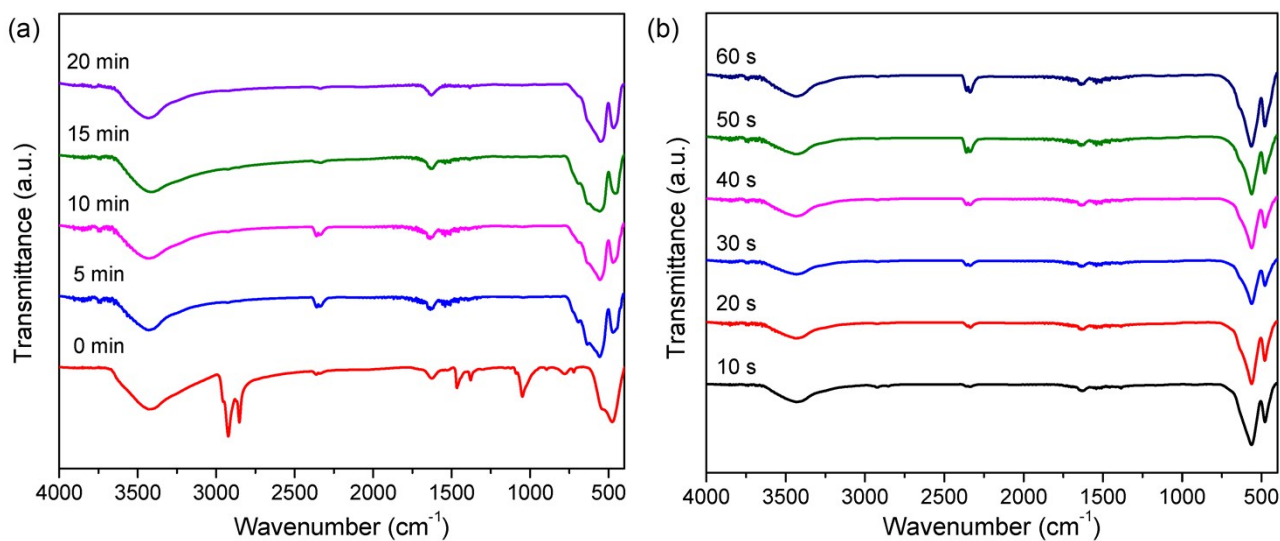

**Fig. S5** FTIR spectra of  $\alpha$ -Fe<sub>2</sub>O<sub>3</sub> QDs annealed at different temperature: (a) 450 °C and (b) 800 °C.

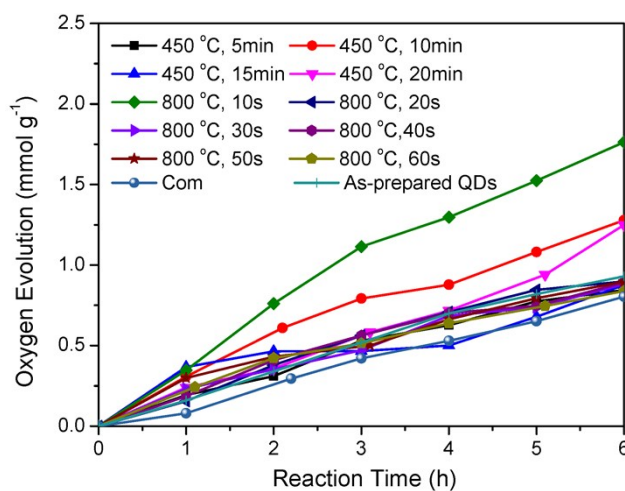

**Fig. S6** Photocatalytic O<sub>2</sub> evolution from an aqueous AgNO<sub>3</sub> solution over commercial  $\alpha$ -Fe<sub>2</sub>O<sub>3</sub> and  $\alpha$ -Fe<sub>2</sub>O<sub>3</sub> QDs annealed at 450 °C and 800 °C for various time.

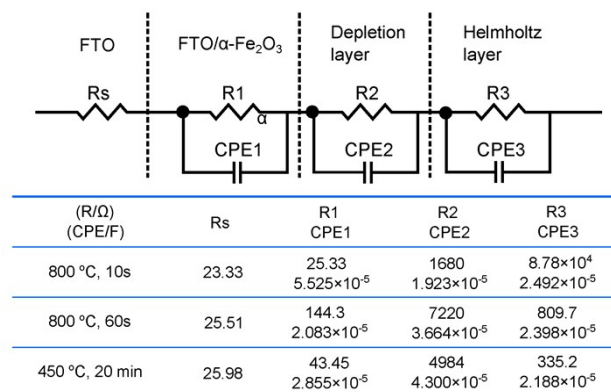

**Fig. S7** The equivalent circuit model of EIS spectra and fitted values.
